# Supplementary material for: Linkage disequilibrium and genome-wide association analysis for anthocyanin pigmentation and fruit color in eggplant
Source: PubMed Central journal article supplement (PMC4210512; doi:10.1186/1471-2164-15-896), 2014-10-14
Supplement: 12864_2014_6597_MOESM1_ESM.pdf [file 12864_2014_6597_MOESM1_ESM.pdf]

**Supplementary Table 1.** List of the accessions used for the association mapping study.

| <b>ID</b> | <b>Accession Name</b>  | <b>Origin</b> | <b>Areal</b>   | <b>Morphological groups*</b> |
|-----------|------------------------|---------------|----------------|------------------------------|
| AM_001    | Dadali                 | Indonesia     | EA             | 1                            |
| AM_004    | Cima viola             | Italy         | WE             | 1                            |
| AM_005    | Bianca ovale           | Italy         | WE             | 2                            |
| AM_010    | 1F5 (9)                | Breeding line | WE             | 2                            |
| AM_011    | Bianca Sicilia         | Italy         | WE             | 2                            |
| AM_013    | CCR3                   | Breeding line | WE             | 1                            |
| AM_014    | Mel                    | Italy         | WE             | 2                            |
| AM_015    | Luga 063               | Italy         | WE             | 1                            |
| AM_016    | Prosperosa             | Italy         | WE             | 3                            |
| AM_018    | Lunga Violetta Cinese  | China         | EA             | 1                            |
| AM_021    | Tal 1/1                | Italy         | WE             | 1                            |
| AM_022    | Angiò 4                | China         | EA             | 1                            |
| AM_023    | BLK 1269               | Breeding line | WE             | 2                            |
| AM_024    | GIC/ 27-9              | Breeding line | WE             | 2                            |
| AM_025    | Tina                   | Italy         | WE             | 1                            |
| AM_026    | DR2                    | Italy         | WE             | 1                            |
| AM_028    | TBE84 D                | Breeding line | WE             | 2                            |
| AM_029    | FanE13 D               | Breeding line | WE             | 2                            |
| AM_030    | FanE27 D               | Breeding line | WE             | 2                            |
| AM_031    | FanE63 D               | Breeding line | WE             | 2                            |
| AM_032    | SNL 534-11             | India         | EA             | 3                            |
| AM_033    | SNL 533-8              | India         | EA             | 3                            |
| AM_034    | SNL 600-1              | India         | EA             | 2                            |
| AM_035    | Cin 01/ 24-6           | China         | EA             | 2                            |
| AM_036    | Viola Cin-A-1          | China         | EA             | 2                            |
| AM_037    | Violetta di toscana    | Italy         | WE             | 3                            |
| AM_038    | Bellezza nera          | Italy         | WE             | 2                            |
| AM_040    | Violetta di Metaponto  | Italy         | WE             | 3                            |
| AM_041    | 28-08/3 (23-09)        | Breeding line | WE             | 3                            |
| AM_042    | 31-08/4 (25-09)        | Breeding line | WE             | 3                            |
| AM_043    | 51-08/4 (29-09)        | Breeding line | WE             | 3                            |
| AM_044    | 52-08/4 (30-09)        | Breeding line | WE             | 3                            |
| AM_045    | 55-08/5 (31-09)        | Breeding line | WE             | 3                            |
| AM_046    | 16-09 ( <i>15-12</i> ) | Breeding line | WE             | 3                            |
| AM_047    | P621-08                | Breeding line | WE             | 3                            |
| AM_048    | P623-08                | Breeding line | WE             | 3                            |
| AM_049    | P645-08                | Breeding line | WE             | 3                            |
| AM_050    | P649-08                | Breeding line | WE             | 3                            |
| AM_051    | P612-08                | Breeding line | WE $\times$ EA | 3                            |
| AM_052    | P390                   | Breeding line | WE $\times$ EA | 3                            |
| AM_053    | P328                   | Breeding line | WE $\times$ EA | 3                            |
| AM_054    | P656-08                | Breeding line | WE             | 3                            |
| AM_055    | msp 73-08              | Breeding line | WE             | 2                            |
| AM_056    | S 1052-08              | Breeding line | WE             | 1                            |
| AM_057    | LI324/06               | Italy         | WE             | 1                            |
| AM_058    | msp 36-08              | Italy         | WE             | 1                            |
| AM_059    | msp 42-08              | Italy         | WE             | 1                            |
| AM_060    | msp 30-08              | Italy         | WE             | 1                            |
| AM_062    | msp 55-08              | Italy         | WE             | 1                            |

|        |                                 |               |    |   |
|--------|---------------------------------|---------------|----|---|
| AM_063 | L422-08                         | Italy         | WE | 1 |
| AM_064 | L717-289                        | Italy         | WE | 1 |
| AM_067 | Uga                             | Italy         | WE | 2 |
| AM_068 | Tana                            | Italy         | WE | 1 |
| AM_069 | Bin 6                           | Italy         | WE | 2 |
| AM_070 | Floralba                        | Italy         | WE | 2 |
| AM_071 | Ind Min                         | India         | EA | 1 |
| AM_072 | SM5/2                           | Breeding line | WE | 2 |
| AM_073 | SM5/13                          | Breeding line | WE | 2 |
| AM_074 | SM5/22                          | Breeding line | WE | 1 |
| AM_076 | S.Nicandro                      | Italy         | WE | 2 |
| AM_086 | LS 3805 minden                  | Japan         | EA | 2 |
| AM_098 | CIN6                            | China         | EA | 3 |
| AM_099 | CIN5                            | China         | EA | 3 |
| AM_100 | CIN7                            | China         | EA | 3 |
| AM_102 | CIN9                            | China         | EA | 3 |
| AM_103 | LS611                           | Japan         | EA | 2 |
| AM_106 | Naga-Ungu                       | Indonesia     | EA | 1 |
| AM_114 | N 258-4                         | India         | EA | 1 |
| AM_121 | Indom melanz                    | Indonesia     | EA | 2 |
| AM_124 | PI17                            | Italy         | WE | 2 |
| AM_126 | Almagro                         | Spain         | WE | 2 |
| AM_127 | Larga negra                     | Spain         | WE | 1 |
| AM_128 | Listada                         | Spain         | WE | 2 |
| AM_129 | Tolga                           | Algeria       | WE | 2 |
| AM_133 | Black Beauty                    | Italy         | WE | 2 |
| AM_134 | Viserba                         | Italy         | WE | 1 |
| AM_135 | Black Beauty                    | Italy         | WE | 2 |
| AM_136 | Tonda Violetta Firenze          | Italy         | WE | 2 |
| AM_137 | Violetta Lunga Romagna          | Italy         | WE | 1 |
| AM_138 | Barbentane                      | France        | WE | 1 |
| AM_139 | Lunga Marina                    | Italy         | WE | 1 |
| AM_140 | Tonda di Valence                | France        | WE | 3 |
| AM_141 | Lunga Violetta Scura Cannellina | Italy         | WE | 1 |
| AM_142 | Tonda Black Beauty              | Italy         | WE | 2 |
| AM_143 | Bellezza Nera                   | Italy         | WE | 2 |
| AM_144 | Lunga Violetta Napoli           | Italy         | WE | 1 |
| AM_146 | Black Beauty                    | Italy         | WE | 2 |
| AM_147 | Violetta Mostruosa NY           | Italy         | WE | 2 |
| AM_148 | Slim Jim                        | India         | EA | 1 |
| AM_149 | Tonda Violetta Scura Valence    | France        | WE | 3 |
| AM_150 | Grossissima Violetta Firenze    | Italy         | WE | 2 |
| AM_151 | Violetta Lunga                  | Italy         | WE | 1 |
| AM_152 | Tonda Bianca                    | Italy         | WE | 2 |
| AM_153 | Prosperosa                      | Italy         | WE | 3 |
| AM_155 | Daejang                         | China         | EA | 1 |
| AM_156 | Buia                            | Italy         | WE | 2 |
| AM_157 | Baffa                           | Italy         | WE | 2 |
| AM_158 | Ank2                            | India         | EA | 2 |
| AM_159 | CN2                             | China         | EA | 3 |
| AM_160 | Dourga                          | France        | WE | 2 |
| AM_162 | Tunisia Baharia                 | Italy         | WE | 3 |
| AM_163 | Pusa Purple Cluster             | India         | EA | 1 |
| AM_167 | Angio 3                         | China         | EA | 1 |

|        |                                |                    |       |   |
|--------|--------------------------------|--------------------|-------|---|
| AM_168 | Angio 5                        | China              | EA    | 2 |
| AM_169 | Bianca striata verde           | Italy              | WE    | 2 |
| AM_170 | SM19/14                        | Breeding line      | WE    | 2 |
| AM_171 | Palermitana                    | Italy              | WE    | 3 |
| AM_173 | Pusa Purple Long               | India              | EA    | 1 |
| AM_174 | JM (Slim Jim)                  | India              | EA    | 1 |
| AM_175 | Cannellina Sarnense            | Italy              | WE    | 1 |
| AM_176 | Sita                           | Italy              | WE    | 2 |
| AM_177 | FiL white                      | Turchia            | WE    | 2 |
| AM_178 | Lunga napoli                   | Italy              | WE    | 1 |
| AM_179 | 1237/06                        | Italy              | WE    | 1 |
| AM_180 | Listada Tacconi                | Italy              | WE    | 2 |
| AM_181 | Suraj(143)                     | India              | EA    | 2 |
| AM_182 | Pusa Round                     | India              | EA    | 2 |
| AM_183 | Chaojiuye Yuanquie             | China              | EA    | 3 |
| AM_184 | He Shanwang                    | China              | EA    | 3 |
| AM_185 | TAI 440                        | Indochinese Region | EA    | 3 |
| AM_187 | Naveen                         | India              | EA    | 2 |
| AM_188 | TAI 444                        | Indochinese Region | EA    | 2 |
| AM_189 | TAI 445                        | Indochinese Region | EA    | 1 |
| AM_190 | TAI 446                        | Indochinese Region | EA    | 1 |
| AM_191 | TAI 449                        | China              | EA    | 3 |
| AM_193 | TAI 453                        | Indochinese Region | EA    | 2 |
| AM_194 | TAI 455                        | Thailand           | EA    | 2 |
| AM_195 | TAI 456                        | Myanmar            | EA    | 2 |
| AM_196 | TAI 457                        | India              | EA    | 2 |
| AM_198 | TH 6413 Raos                   | Indonesia          | EA    | 1 |
| AM_199 | TAI 470                        | Thailand           | EA    | 2 |
| AM_200 | TAI 475                        | Thailand           | EA    | 2 |
| AM_201 | TAI 477                        | Thailand           | EA    | 2 |
| AM_202 | TAI 480                        | India              | EA    | 2 |
| AM_203 | TAI 481                        | China              | EA    | 1 |
| AM_204 | TAI 483                        | India              | EA    | 1 |
| AM_205 | TAI 484                        | India              | EA    | 1 |
| AM_206 | 7 CN                           | China              | EA    | 3 |
| AM_207 | 9 CN                           | China              | EA    | 3 |
| AM_208 | 17 CN                          | China              | EA    | 1 |
| AM_210 | 67-3                           | Breeding line      | WExEA | 3 |
| AM_211 | 305 E40                        | Breeding line      | WE    | 1 |
| AM_212 | CGN17464 (PI 176759)           | Turkey             | WE    | 2 |
| AM_213 | CGN23345 (PI 169641)           | Turkey             | WE    | 2 |
| AM_214 | CGN18783 (Croisette)           | France             | WE    | 1 |
| AM_215 | CGN18531 (Patchem)             | Turkey             | WE    | 1 |
| AM_217 | CGN17449 (Topak; PI 175917)    | Turkey             | WE    | 2 |
| AM_218 | CGN17451 (Dolmalik; PI 176758) | Turkey             | WE    | 2 |
| AM_221 | CGN17579 (PI 169648)           | Turkey             | WE    | - |
| AM_222 | CGN23346 (Topatan; PI 169649)  | Turkey             | WE    | 2 |
| AM_224 | CGN17581 (PI 169651)           | Turkey             | WE    | 1 |
| AM_228 | CGN23343 (PI 167328)           | Turkey             | WE    | 1 |
| AM_230 | CGN23344 (Bostan; PI 169639)   | Turkey             | WE    | 2 |
| AM_231 | CGN18591 (PI 171847)           | Turkey             | WE    | 2 |
| AM_232 | CGN18595 (PI 171852)           | Turkey             | WE    | 1 |
| AM_233 | CGN18779 (De Barbentane)       | France             | WE    | 1 |
| AM_234 | CGN23309 (Dolg; PI 358232)     | Macedonia          | WE    | 1 |

|        |                                   |               |    |   |
|--------|-----------------------------------|---------------|----|---|
| AM_235 | CGN18484 (Morska Pata; PI 358242) | Macedonia     | WE | 1 |
| AM_236 | CGN18782 (Violette Longue Hative) | France        | WE | 1 |
| AM_238 | CGN17453 (Yesilkoy 27)            | Turkey        | WE | 1 |
| AM_240 | CGN18578 (Kemer; PI 169655)       | Turkey        | WE | - |
| AM_241 | CGN23348 (PI 169658)              | Turkey        | WE | 1 |
| AM_243 | CGN18585 (PI 169663)              | Turkey        | WE | 1 |
| AM_249 | CGN23351 (PI 174362)              | Turkey        | WE | 2 |
| AM_251 | CGN24467 (Berenjena Listada)      | Spain         | WE | 2 |
| AM_252 | CGN18505 (Berenjena Redonda)      | Spain         | WE | 3 |
| AM_253 | CGN24468 (Caminal)                | France        | WE | 1 |
| AM_257 | CGN18776 (Longue Hative)          | France        | WE | 1 |
| AM_258 | CGN17456 (Monda)                  | France        | WE | 2 |
| AM_259 | CGN23315 (Ronde de Valence)       | France        | WE | 3 |
| AM_260 | CGN17479 (Semiredonda Jaspeada)   | Spain         | WE | 2 |
| AM_262 | CGN23772                          | Nigeria       | WE | 2 |
| AM_264 | Mezza Lunga Violetta              | Italy         | WE | 1 |
| AM_265 | Lunghissima Precoce Violetta      | Italy         | WE | 1 |
| AM_266 | Dingaras                          | China         | EA | 1 |
| AM_268 | L 129                             | Indonesia     | EA | 1 |
| AM_269 | Talindo                           | Indonesia     | EA | 1 |
| AM_271 | DS1                               | Breeding line | WE | 2 |
| AM_273 | DS2                               | Breeding line | WE | 2 |
| AM_274 | DS4                               | Breeding line | WE | 2 |
| AM_275 | 1 CAAS                            | China         | EA | 3 |
| AM_278 | 4 CAAS                            | China         | EA | 3 |
| AM_279 | 5 CAAS                            | China         | EA | 3 |
| AM_284 | 10 CAAS                           | China         | EA | 1 |
| AM_285 | 11 CAAS                           | China         | EA | 1 |
| AM_288 | 14 CAAS                           | China         | EA | 2 |
| AM_289 | 15 CAAS                           | China         | EA | 3 |
| AM_290 | 16 CAAS                           | China         | EA | 3 |
| AM_291 | 17 CAAS                           | China         | EA | 3 |
| AM_292 | 18 CAAS                           | China         | EA | 1 |
| AM_293 | 19 CAAS                           | China         | EA | 1 |

\*Morphological groups as defined by Cericola et al. [17]
