# Supplementary material for: Linkage disequilibrium and genome-wide association analysis for anthocyanin pigmentation and fruit color in eggplant
Source: PubMed Central journal article supplement (PMC4210512; doi:10.1186/1471-2164-15-896), 2014-10-14

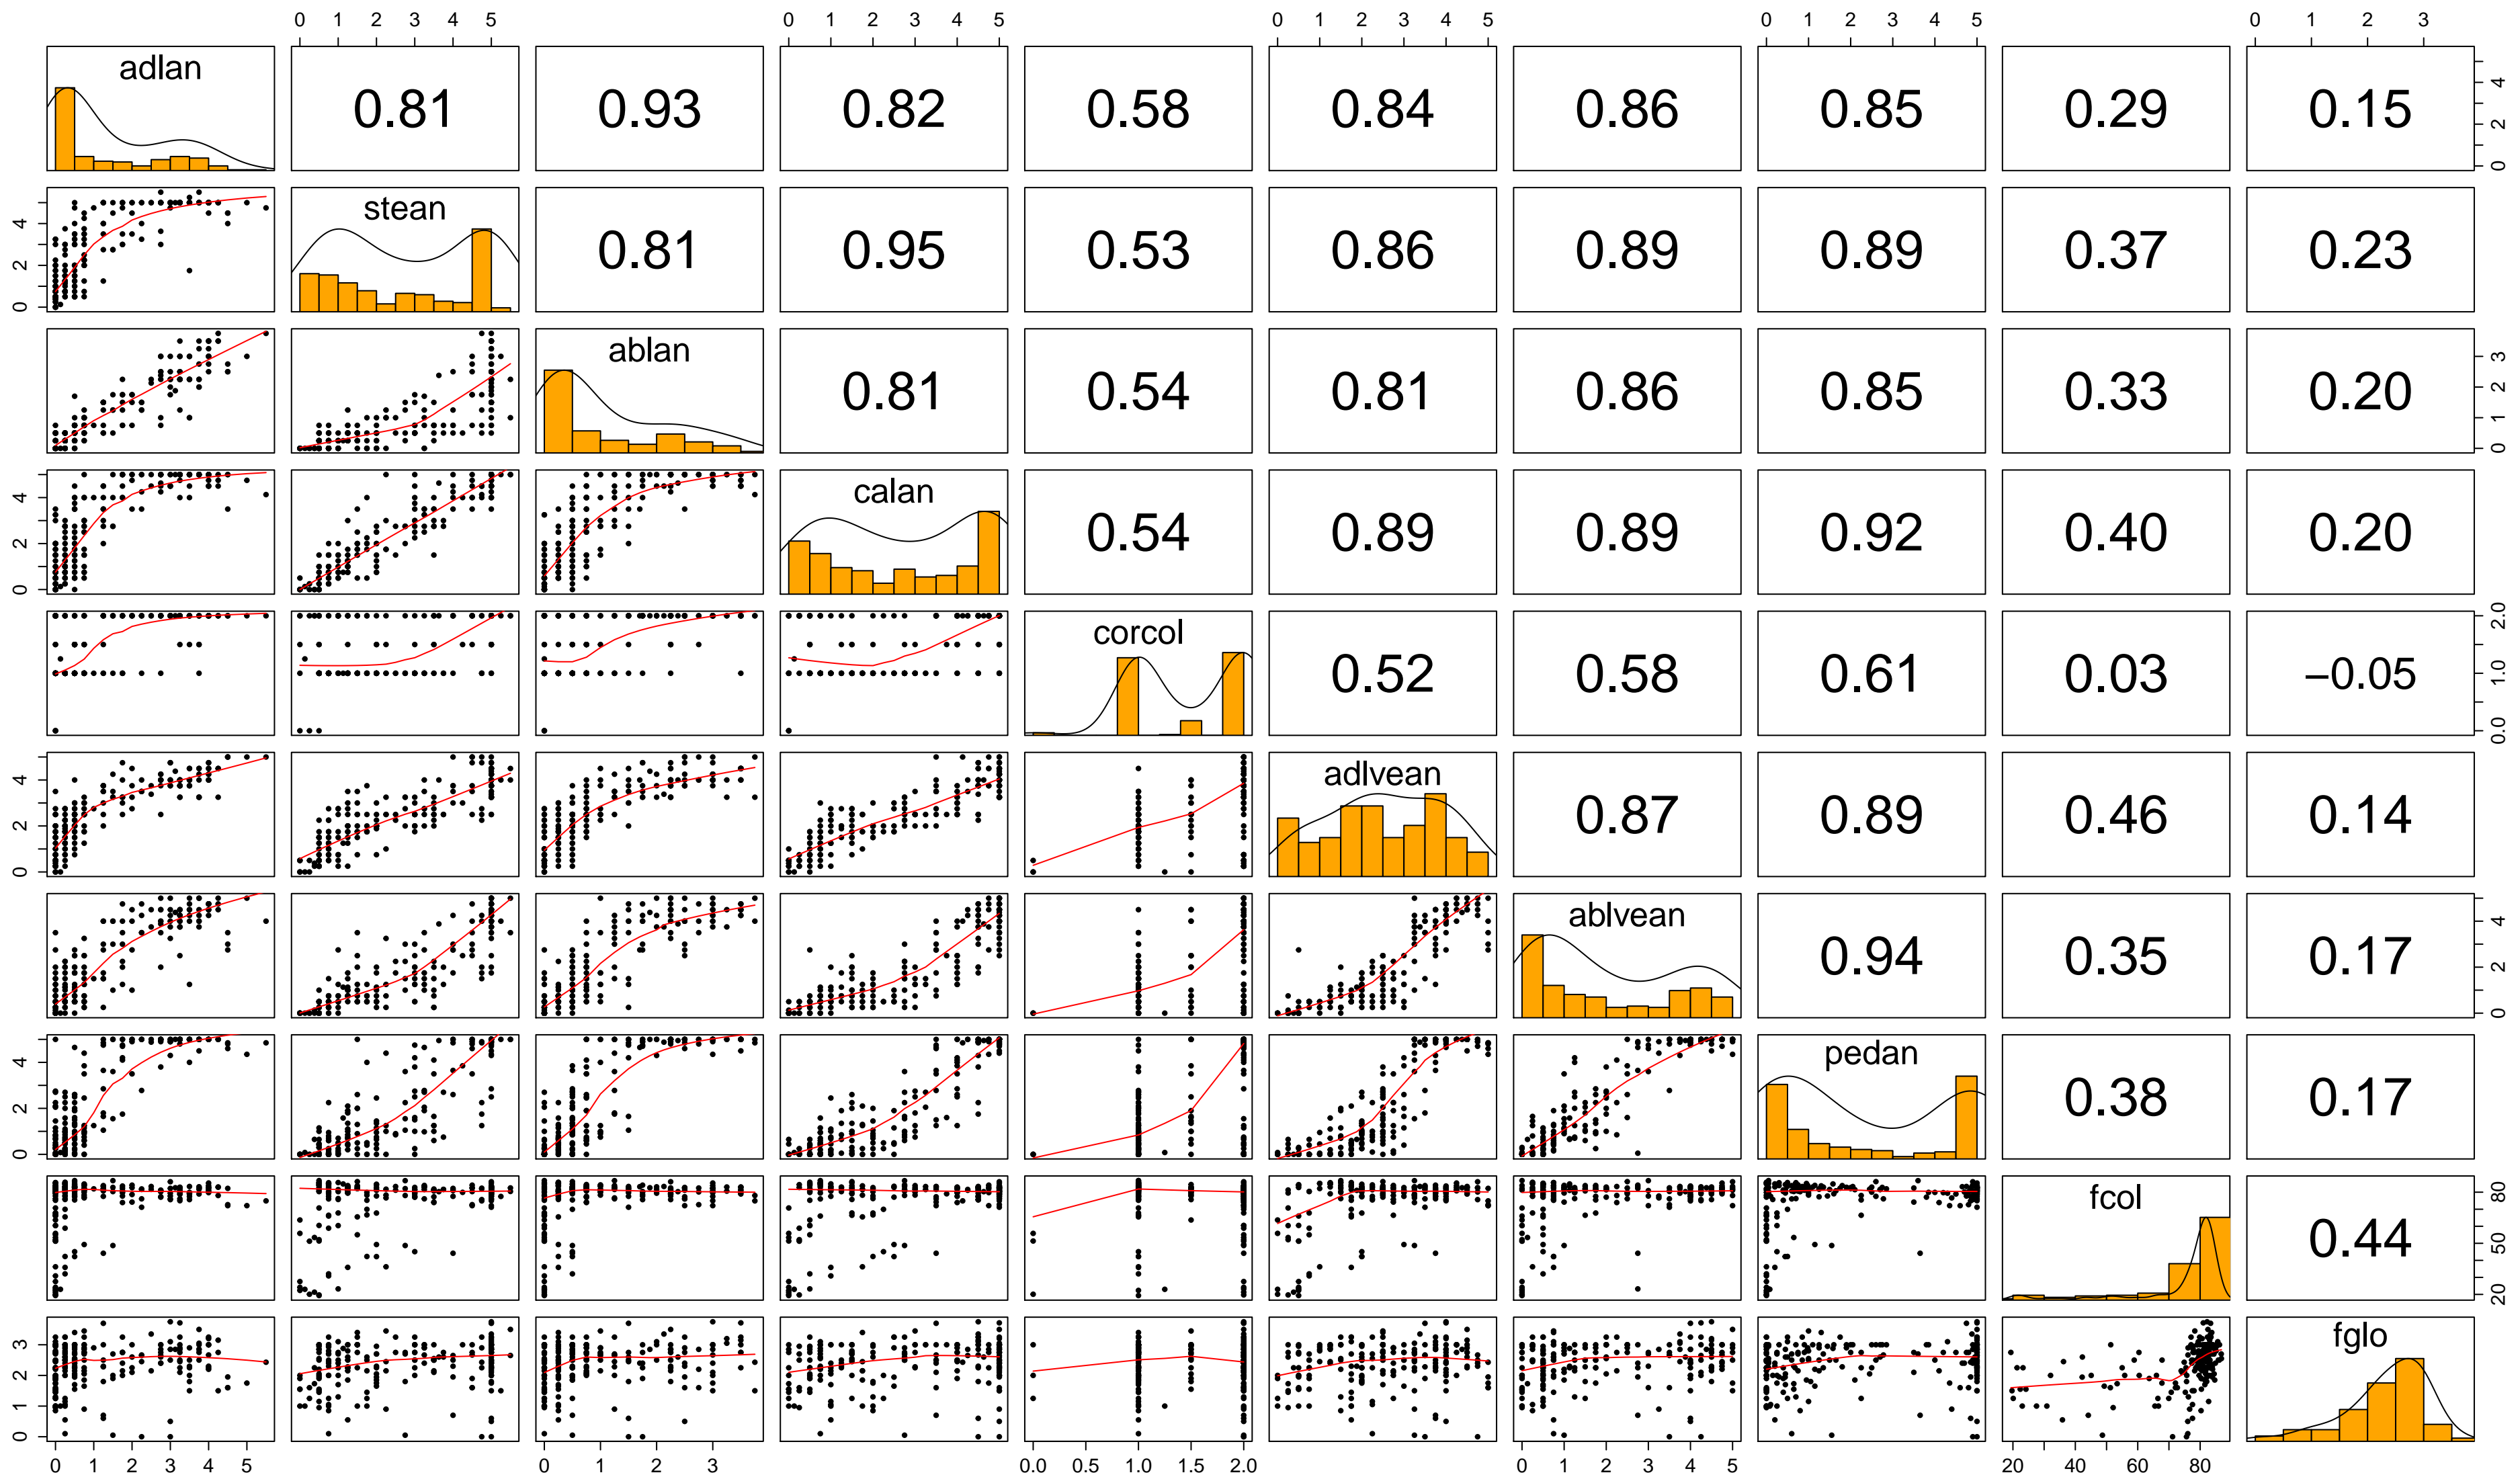

Supplement: 12864_2014_6597_MOESM5_ESM.pdf [file 12864_2014_6597_MOESM5_ESM.pdf]
